# Supplementary material for: Tadpole-Shaped POSS-Based Copolymers and the Aggregation Behavior at Air/Water Interface
Source: Hindawi journal article supplement (doi:10.1155/2018/3787843), 2018-01-01
Supplement: f1 [file 3787843.f1.docx]

**Supporting Information**

**Tadpole-Shaped POSS-Based Copolymers and the Aggregation Behavior at Air/Water Interface**

Lin Zhua,b, Fang Chena,b*, Xiaoyan Maa,b, Xiu Qianga,b, Zhiguang Lia,b,Chen Donga,b,Duyang Zang b

a Key Laboratory of Polymer Science and Technology, Shaanxi Province, School of Science, Northwestern Polytechnical University, Xi’an 710129, China

b Key Laboratory of Space Applied Physics and Chemistry, Ministry of Education, School of Science, Northwestern Polytechnical University, Xi’an 710072, China

*[*]Corresponding author,* [*chenfang820811@nwpu.edu.cn*](mailto:chenfang820811@nwpu.edu.cn) *Tel/Fax: +86-29-88431621*

## Synthesis of POSS-PMMA*-b-*PTFEMA

The synthesis was carried out using monofunctional POSS (POSS-Cl) as radical initiator in a one-pot ATRP polymerization by two step feeding procedure. The synthesis process of POSS-PTFEMA-*b*-PMMA was shown in Figure 1S. In a typical run, oxygen in a flask cooled in ice bath was removed by continuous dry nitrogen gas. Then, POSS-Cl (0.20 g, 0.1 mmol), toluene (20 mL), PMDETA (0.12 mL, 0.6 mmol), TFEMA (20 mL) and CuCl (0.020 g, 0.2 mmol) were added into the flask equipped with magnetic stir bar. The system was evacuated and filled with dry nitrogen gases. Then, the flask was placed in an oil bath warmed at 110 oC. After 24 h, MMA (20 mL) was added into the system and reacted for another 24 h. The polymerization was terminated by cooling the flask in ice water. Then the mixture was diluted with tetrahydro-furan (THF) and filtered over alumina column to remove the catalyst and settled in tenfold methanol-water solution. The final product POSS-PTFEMA-*b*-PMMA was obtained after filtration and dried at 50 oC in a vacuum overnight.

The polymerization processes of POSS-PMMA1-*b*-PTFEMAand POSS-PMMA2-*b*-PTFEMA are similar as POSS-PTFEMA-*b*-PMMA. The difference is that, take same volume (double volume) of MMA as monomer at the first 24h reaction, and same volume of second monomer TFEMA was added into system and reacted for one more 24 h. The remaining purification method and the afterwards treatment were the same.

**Fig.S1** Synthesis route of POSS-PTFEMA-*b*-PMMA

## Characterization of the tadpole-shaped copolymers

The synthesized compounds were characterized by 1H NMR spectra and GPC. 1H NMR spectra was recorded on a Bruker Avance 300 NMR spectrometer in CDCl3 at 298 K with tetramethylsilane (TMS) as a standard. GPC of DIONEX BJ/U3000 was used to determine the molecular weights (Mn) and the polydispersity index (PDI), with ShodexOHPak SB-803HQ (8×300mm) as chromatographic column. It was carried out at 298 K with THF as solvent (0.5mL/min) and polystyrene as calibration.

## Structure of POSS based copolymers

The 1H NMR spectra of POSS-Cl and all three tadpole-shaped copolymers are shown in Figure S2. Apart from for the overlapping region of broad proton signals from 0.90 to 2.11 ppm in Fig S2(b), a single peak at 4.34 ppm stands for proton Hf of *-CH2CF3*, and the peaks at 3.60ppm are ascribed to Hi of *-COO-CH3*, which indicate the successful polymerization of POSS-PTFEMA-b-PMMA. Same chemical shift are also revealed by POSS-PMMA1-*b*-PTFEMAand POSS-PMMA2-*b*-PTFEMA shown in Fig S2(c) and Fig S2(d). It is confirmed that three kinds of polymers with different block sequence and ratio were synthesized successfully.





**Fig.S2** 1H NMR spectra of POSS-Cl and all three tadpole-shaped copolymers: (a) POSS-Cl, (b) POSS-PTFEMA-*b*-PMMA, (c) POSS-PMMA1-*b*-PTFEMA, (d) POSS-PMMA2-*b*-PTFEMA

As shown in Tab.S1, The molecular weights and polydispersity indexes (PDI: Mw/Mn) of three polymers are obtained by GPC analysis and the molecular weights of each block is also calculated according to Mn and 1HNMR spectra. It can be seen that the molecular weight distribution is relatively narrow, which confirms that the ATRP reactions can be well controlled.

**Tab S1.** Characteristic of all three copolymers

| [Sample](javascript:showjdsw('showjd_0','j_0')) | Mean Molecular Weight(g/mol) | | | PDI |
| --- | --- | --- | --- | --- |
| Total | PMMA | PTFEMA |
| POSS-PTFEMA-*b*-PMMA | 52100 | 23600 | 27000 | 1.94 |
| POSS-PMMA1-*b-*PTFEMA | 50500 | 27700 | 21800 | 1.47 |
| POSS-PMMA2-*b-*PTFEMA | 76500 | 46600 | 28900 | 1.92 |
